# Supplementary material
Source: PubMed Central journal article supplement (PMC9200084)
Supplement: plantbiotechnology-39-1-21.1225a-s001.pdf [file plantbiotechnology-39-1-21.1225a-s001.pdf]

**Table S1. Primers used for RT-qPCR analysis**

| Target       | Primer sequence                                                                |
|--------------|--------------------------------------------------------------------------------|
| <i>TUA4</i>  | Forward: 5'-GATTTGTGTGGGTTTCTCTA-3'<br>Reverse: 5'-AGAGATAACATGGCTACGAA-3'     |
| <i>LBD16</i> | Forward: 5'-AATCTTTCAGCAACACGAGC-3'<br>Reverse: 5'-AACCCCTATTCCATCGTGACC-3'    |
| <i>LBD18</i> | Forward: 5'-CAACCGCTCTTTTTCACTCC-3'<br>Reverse: 5'-CGAAGATGGATGCTAGGTCA-3'     |
| <i>PLT3</i>  | Forward: 5'-CTACGATCCACGTCACCACC-3'<br>Reverse: 5'-TCATCGACCTCTGAACCGGA-3'     |
| <i>PLT5</i>  | Forward: 5'-GTTGTGTGGACAATATGAATGAT-3'<br>Reverse: 5'-ATGACGAAAAACACCGTGGA-3'  |
| <i>PLT7</i>  | Forward: 5'-AATGCAAAACCTGAACCTCTA-3'<br>Reverse: 5'-GTGACAGAGAAAACGTTAAGCA-3'  |
| <i>WOX5</i>  | Forward: 5'-AGGGAGAGGCAGAAACGTC-3'<br>Reverse: 5'-GTCTTCAAATGAATTCACCGGAAAG-3' |

**Supplementary Figure S1. Effects of auxin biosynthesis inhibitor treatment with IAA or IPA addition in CIM culture on shoot regeneration**

**(A)** Numbers of regenerated shoots (green) and adventitious roots (orange) in hypocotyl explants cultured on SIM for 10 days after 4.5 days of culture on CIM supplemented with or without 25  $\mu\text{M}$  PPBo and the indicated concentrations of IAA. Mean values of 12 explants are shown with standard errors. Values with an asterisk(s) are significantly different from the control (0 mM) value at  $p < 0.05$  (\*) or 0.01 (\*\*) (Tukey's test).

**(B)** Numbers of regenerated shoots (green) and adventitious roots (orange) per hypocotyl explant cultured on SIM for 10 days after 4.5 days of culture on CIM supplemented with or without 100  $\mu\text{M}$  Kyn and the indicated concentrations of IPA. Mean values of 12 explants are shown with standard errors. Values with an asterisk(s) are significantly different from the control (0  $\mu\text{M}$ ) value at  $p < 0.05$  (\*) or 0.01 (\*\*) (Tukey's test).

**Supplementary Figure S2. Effects of PPBo treatment in SIM culture on shoot regeneration**

**(A)** Hypocotyl explants cultured on CIM for 4.5 days and then cultured on SIM with the indicated concentration of PPBo for 14 days. Scale bar = 2 mm.

**(B)** Numbers of regenerated shoots (green) and adventitious roots (orange) in hypocotyl explants cultured on SIM with PPBo for 10 days after 4.5 days of CIM culture. Mean values of 12–18 explants are shown with standard errors. Values with an asterisk(s) are significantly different from the control (0  $\mu\text{M}$ ) value at  $p < 0.05$  (\*) or 0.01 (\*\*) (Tukey's test).

**Supplementary Figure S3. Effects of PPBo treatments at various timings during CIM culture on shoot regeneration**

**(A)** Time schedules of PPBo treatment. During CIM culture, hypocotyl explants were transferred every 1.5 days to fresh CIM containing or not containing 25  $\mu$ M PPBo.

**(B)** Numbers of regenerated shoots (green) and adventitious roots (orange) in hypocotyl explants cultured on SIM for 10 days after 4.5 days of CIM culture during which explants were treated with PPBo according to the time schedules **a** to **f** (A). Mean values of 31 or 32 explants are shown with standard errors. Values with different symbols are significantly different from each other at  $p < 0.01$  (Tukey's test).

**A**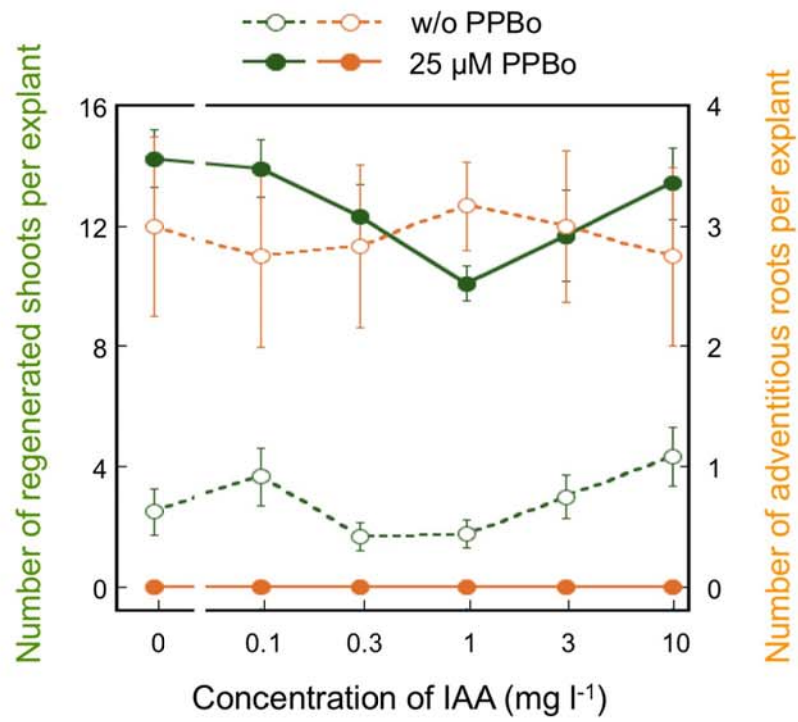**B**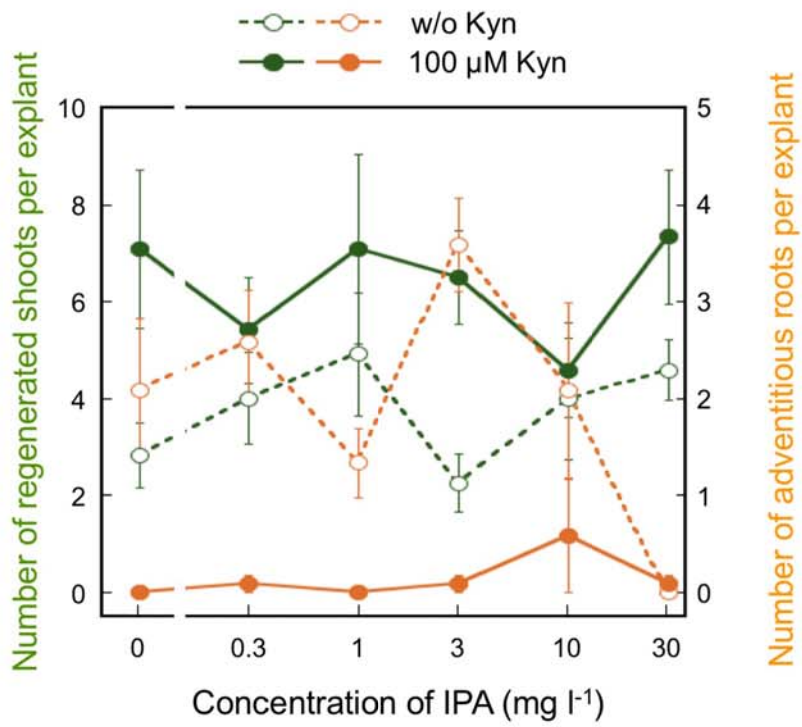

Figure S1 (Ohbayashi et al.)

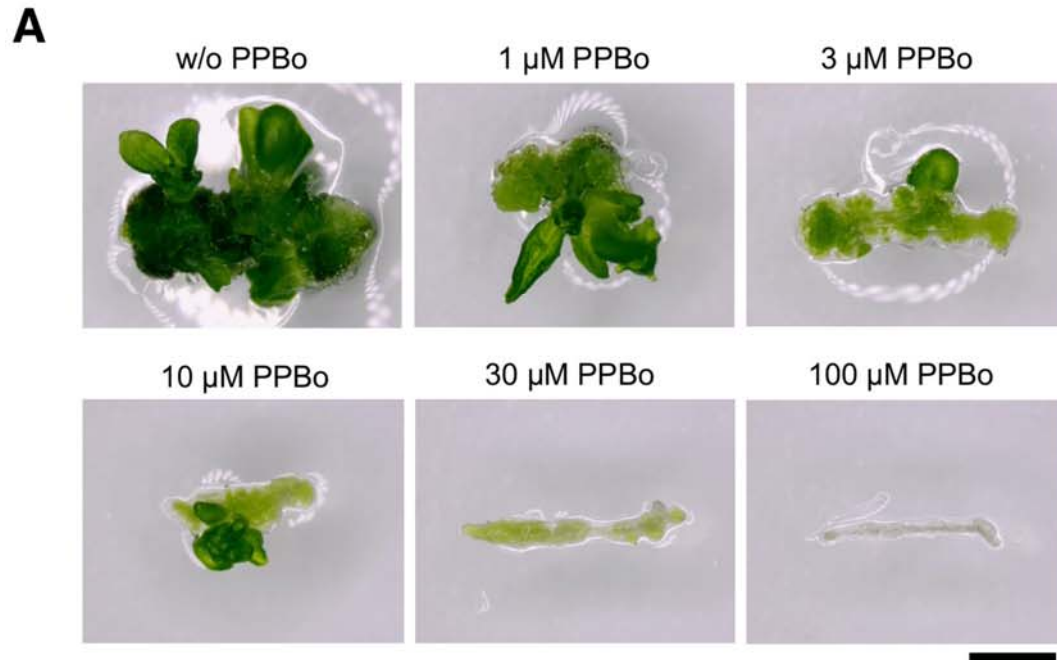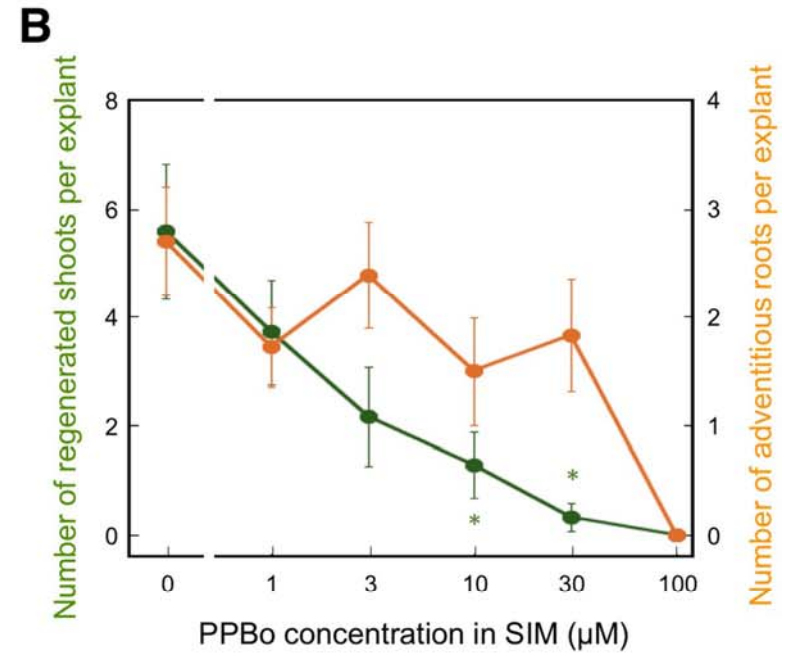

Figure S2 (Ohbayashi et al.)

**A**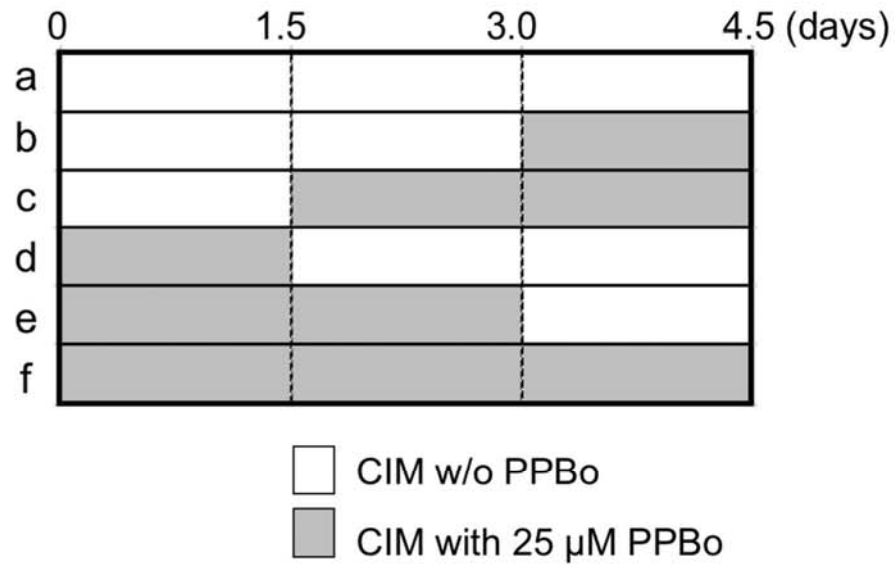**B**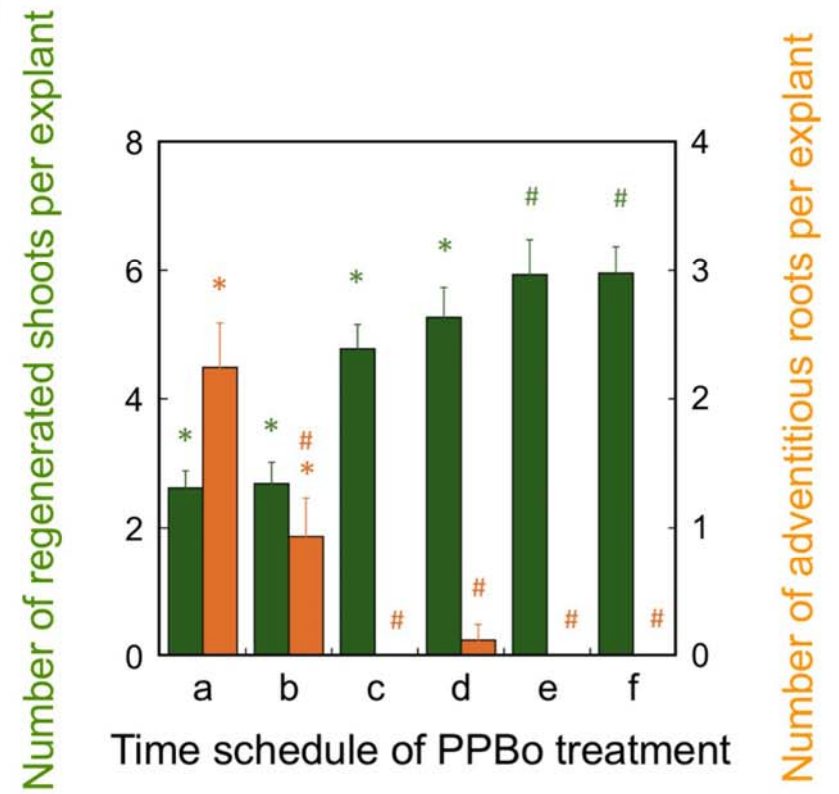

Figure S3 (Ohbayashi et al. )
